# Supplementary material for: Multiple-resonance thermally activated delayed fluorescence materials based on phosphorus central chirality for efficient circularly polarized electroluminescence
Source: Royal Society of Chemistry journal article supplement (doi:10.1039/d4mh00605d), 2024-01-01
Supplement: d4mh00605d1.pdf [file d4mh00605d1.pdf]

## **Supporting Information**

### **Multiple-resonance thermally activated delayed fluorescence materials based on phosphorus central chirality for efficient circularly polarized electroluminescence**

Yu Wang, Zi-Yi Lv, Zi-Xuan Chen, Shuai Xing, Zhong-Zhong Huo, Xian-Fang Hong, Li Yuan, Wei Li, and You-Xuan Zheng\*

<sup>a</sup> State Key Laboratory of Coordination Chemistry, Jiangsu Key Laboratory of Advanced Organic Materials, School of Chemistry and Chemical Engineering, Nanjing University. Nanjing 210023, P. R. China, E-mail: yxzheng@nju.edu.cn

## S1. General Information

All solvents and reagents were commercially available without further purification. NMR measurements were conducted on a Bruker AM 400 spectrometer. High-resolution mass spectra were recorded on a MICROTOF-Q III instrument. Absorption and emission spectra were measured on a UV-3100 and a Hitachi F-4600 photoluminescence spectrophotometer, respectively. Electrochemical measurements were conducted on an AUTOLAB-CV-75W analyzer with a scan rate of 100 mV/s. The electrochemical cell was a standard three-compartment cell composed of a glass carbon working electrode, a Pt auxiliary electrode, and a Pt wire reference electrode. All tests were performed using [Bu<sub>4</sub>N][PF<sub>6</sub>] (0.1 M) as the supporting electrolyte. The voltammograms were obtained in anhydrous and nitrogen saturated CH<sub>2</sub>Cl<sub>2</sub> solutions. The potentials are reported relative to the ferrocene/ferrocenium couple. The absolute photoluminescence quantum yields of the compounds were measured with HORIBA FL-3 fluorescence spectrometer. The decay lifetimes of the compounds were measured with Edinburgh FLS980 fluorescence spectrometer. Fluorescence lifetime testing, using an FPGA based TDC-TCSPC module (MODEL: FF4, Orient KOJI Ltd., Tianjin, CHN), coupled with a pulse 355 nm laser output of 1 kHz, can achieve uninterrupted testing from 100 ps<sup>-1</sup> ms. At the same time, in logarithmic abscissa mode, it is easy to collect the decay curve in the full time domain and use it for photon number statistics. CPL and CPEL spectra were performed with a JASCO CPL-300 spectrometer. Thermogravimetric analysis measurements were performed on a Pyris 1 DSC under nitrogen at a heating rate of 10 °C min<sup>-1</sup>. The ground state geometries are based on single crystal structure, electron cloud distributions were calculated using Gaussian 09 software<sup>1</sup> by density functional theory (DFT) using the M062X functional with the 6-31G(d) basis set. Time-dependent DFT (TD-DFT) with PBE0 functional with the 6-31G(d, p) basis set. The input files and orbital representations were generated with Multiwfn<sup>2</sup> (isovalue = 0.03). X-ray single crystals were obtained on a Bruker D8 X-ray single crystal Venture diffractometer using CuK $\alpha$  radiation ( $\lambda = 1.54178$ ) at 180K for all compounds. SAINT5.0 and SADABS programs are used for the reduction and absorption correction of crystal data. The resolution and refinement of the crystal

structure are obtained on the SHELXTL-97 software, using the direct or Patterson methods. All non-hydrogen source coordinates are obtained by using the differential Fourier method and the least square method. Then the geometric method and the difference value are used. The hydrogen atom coordinates were obtained by Fourier method, and the crystal structure was obtained. The rate constants of intersystem crossing ( $k_{ISC}$ ) and reverse intersystem crossing ( $k_{RISC}$ ) were calculated from the following six equations:

$$k_p = 1/\tau_p \dots \dots \dots \text{Eq.(1)}$$

$$k_d = 1/\tau_d \dots \dots \dots \text{Eq.(2)}$$

$$k_{r,s} = \Phi_p k_p + \Phi_d k_d \approx \Phi_p k_p \dots \dots \dots \text{Eq.(3)}$$

$$k_{nr,s} = \frac{1 - \Phi_{PL}}{\Phi_{PL}} k_{r,s} \dots \dots \dots \text{Eq.(4)}$$

$$k_{ISC} = k_p - k_{r,s} - k_{nr} \dots \dots \dots \text{Eq.(5)}$$

$$k_{RISC} = (k_p k_d \Phi_d) / (k_{ISC} \Phi_p) \dots \dots \dots \text{Eq.(6)}$$

The  $\tau_p$  and  $\tau_d$  represent the prompt and decay fluorescence lifetimes, respectively, which were determined from transient PL spectra. The  $k_p$  and  $k_d$  represent the decay rate constants for prompt and delayed fluorescence, respectively.  $\Phi_p$  and  $\Phi_d$  indicate prompt and delayed fluorescence components and can be distinguished from the total  $\Phi_{PL}$  by comparing the integrated intensities of prompt and delayed components in the transient PL spectra.

## S2. Experiment section

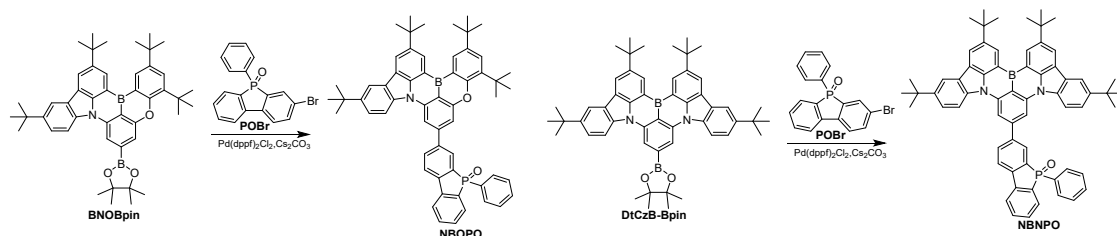

**Scheme S1.** Synthetic procedure of NBOPO and NBNPO

Compounds DtCzB-Bpin<sup>3</sup>, BNOBpin<sup>4</sup>, POBr<sup>5</sup> were synthesized according to previously reported procedures.

**Synthesis of NBOPO.** The mixture of BNOBpin (0.52 g, 0.75 mmol), POBr (0.18 g, 0.50 mmol), Pd(dppf)Cl<sub>2</sub> (0.04 g, 0.05 mmol), Cs<sub>2</sub>CO<sub>3</sub> (0.49 g, 1.50 mmol) in THF/water (50 mL/10 mL) was heated at 75 °C for 24 hours under nitrogen. After cooling to RT, the solvent was removed under reduced pressure and the residue was dissolved in H<sub>2</sub>O (30 mL) and extracted with CH<sub>2</sub>Cl<sub>2</sub>. Then the organic layer was dried over Na<sub>2</sub>SO<sub>4</sub>. CH<sub>2</sub>Cl<sub>2</sub> was evaporated under reduced pressure. The crude product was purified with chromatography on silica using PE/EA (5/1, v/v) as eluent to give yellow solid. Yield: 0.20 g, 48%. <sup>1</sup>H NMR (400 MHz, Methylene CD<sub>2</sub>Cl<sub>2</sub>) δ 9.01 (d, *J* = 1.9 Hz, 1H), 8.80 (d, *J* = 2.4 Hz, 1H), 8.53 (d, *J* = 1.8 Hz, 1H), 8.41 (d, *J* = 1.3 Hz, 1H), 8.37 (d, *J* = 8.8 Hz, 1H), 8.31 (d, *J* = 2.0 Hz, 1H), 8.22 (dd, *J* = 10.2, 1.7 Hz, 1H), 8.17 (dt, *J* = 8.1, 1.5 Hz, 1H), 8.09 (dd, *J* = 8.0, 3.0 Hz, 1H), 7.98 (dd, *J* = 7.8, 2.9 Hz, 1H), 7.83 (d, *J* = 2.4 Hz, 1H), 7.81 – 7.65 (m, 5H), 7.63 (d, *J* = 1.2 Hz, 1H), 7.56 – 7.36 (m, 4H), 1.68 (s, 9H), 1.63 (s, 9H), 1.53 (d, *J* = 2.5 Hz, 18H). <sup>13</sup>C NMR (101 MHz, CD<sub>2</sub>Cl<sub>2</sub>) δ 159.48, 156.82, 146.12, 146.06, 145.43, 144.91, 143.12, 142.98, 142.87, 142.68, 142.14, 141.92, 141.87, 141.66, 138.37, 137.98, 135.21, 134.34, 134.17, 133.94, 133.32, 132.66, 132.64, 132.16, 131.47, 131.36, 131.13, 130.22, 130.17, 130.12, 130.05, 129.36, 129.27, 129.18, 129.14, 129.11, 127.20, 125.22, 124.45, 122.47, 122.36, 122.10, 122.01, 121.65, 117.78, 114.27, 107.88, 106.35, 35.82, 35.51, 35.15, 35.09, 32.28, 31.95, 31.82, 30.64, 27.34. ESI-MS. Calcd. for C<sub>58</sub>H<sub>58</sub>BNO<sub>2</sub>P<sup>+</sup>([M+H])<sup>+</sup>: *m/z* 842.4293. Found: *m/z* 842.4290.

**Synthesis of NBNPO.** The mixture of DtCzB-Bpin (0.58 g, 0.75 mmol), POBr (0.18 g, 0.50 mmol), Pd(dppf)Cl<sub>2</sub> (0.04 g, 0.05 mmol), Cs<sub>2</sub>CO<sub>3</sub> (0.49 g, 1.50 mmol) in THF/water (50 mL/10 mL) was heated at 75 °C for 22 hours under nitrogen. After cooling to RT, the solvent was removed under reduced pressure and the residue was dissolved in H<sub>2</sub>O (30 mL) and extracted with CH<sub>2</sub>Cl<sub>2</sub>. Then the organic layer was dried over Na<sub>2</sub>SO<sub>4</sub>. CH<sub>2</sub>Cl<sub>2</sub> was evaporated under reduced pressure. The crude product was purified with chromatography on silica using PE/EA (5/1, v/v) as eluent to give yellow solid. Yield: 0.26 g, 57%. <sup>1</sup>H NMR (400 MHz, CDCl<sub>3</sub>) δ 9.09 (d, *J* = 1.9 Hz, 2H), 8.51 – 8.41 (m, 4H), 8.35 (d, *J* = 8.8 Hz, 2H), 8.28 – 8.19 (m, 3H), 8.15 – 8.02 (m, 2H), 7.94 (dd, *J* = 8.0, 2.6 Hz, 1H), 7.88 – 7.73 (m, 3H), 7.71 – 7.62 (m, 3H), 7.55 – 7.37 (m, 4H),

1.67 (s, 18H), 1.53 (s, 18H).  $^{13}\text{C}$  NMR (101 MHz,  $\text{CDCl}_3$ )  $\delta$  145.60, 144.89, 144.77, 143.59, 143.49, 141.84, 141.57, 138.34, 134.75, 133.74, 133.29, 132.45, 131.32, 131.21, 130.46, 130.28, 130.19, 129.89, 129.38, 129.28, 129.06, 128.94, 127.24, 124.87, 123.83, 122.54, 122.16, 121.76, 121.64, 121.55, 120.88, 117.43, 114.29, 106.97, 35.32, 34.96, 32.33, 31.97, 29.86, 22.85, 14.27, 1.18. ESI-MS. Calcd. for  $\text{C}_{64}\text{H}_{61}\text{BN}_2\text{OP}^+([\text{M}+\text{H}]^+)$ :  $m/z$  915.4609. Found:  $m/z$  915.4607.

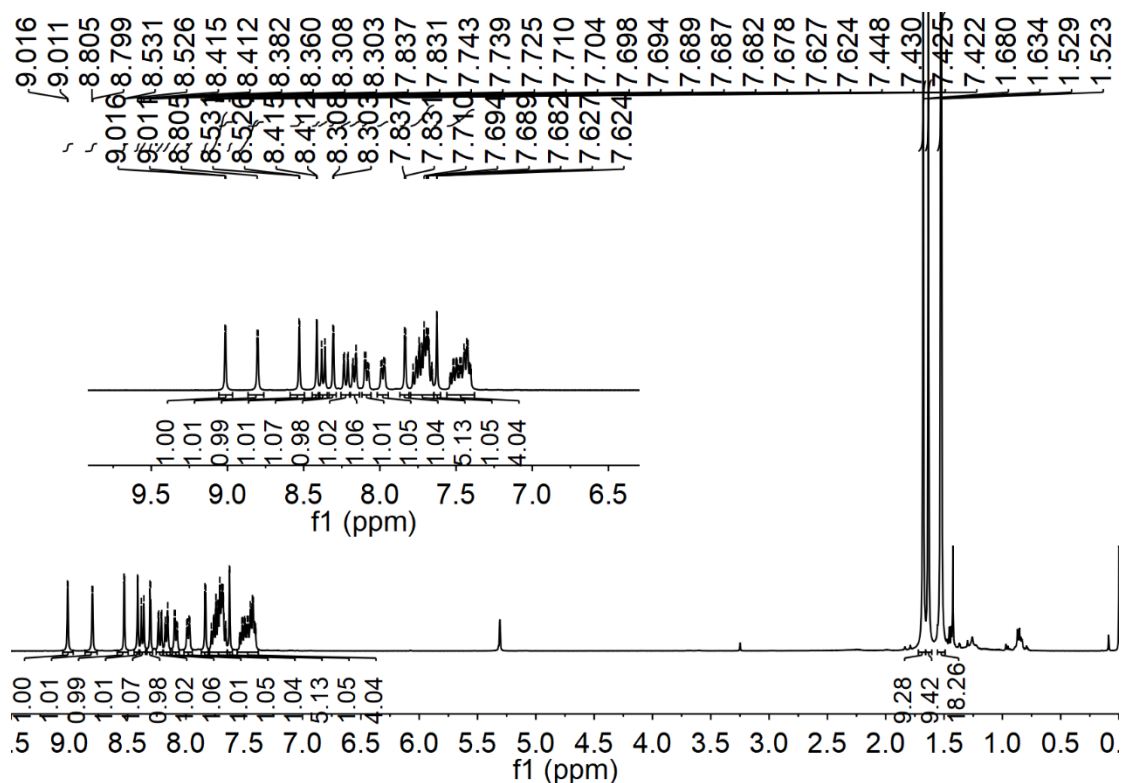

**Figure S1.**  $^1\text{H}$  NMR (400 MHz,  $\text{CD}_2\text{Cl}_2$ ) spectrum of NBOPO.

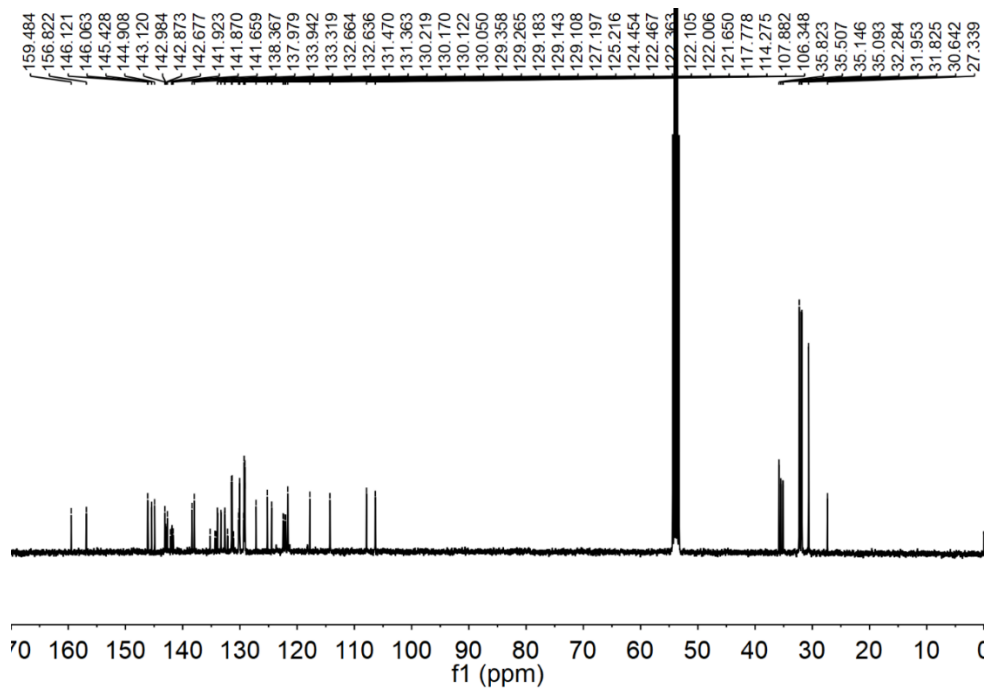

**Figure S2.**  $^{13}\text{C}$  NMR (101 MHz,  $\text{CD}_2\text{Cl}_2$ ) spectrum of NBOPO.

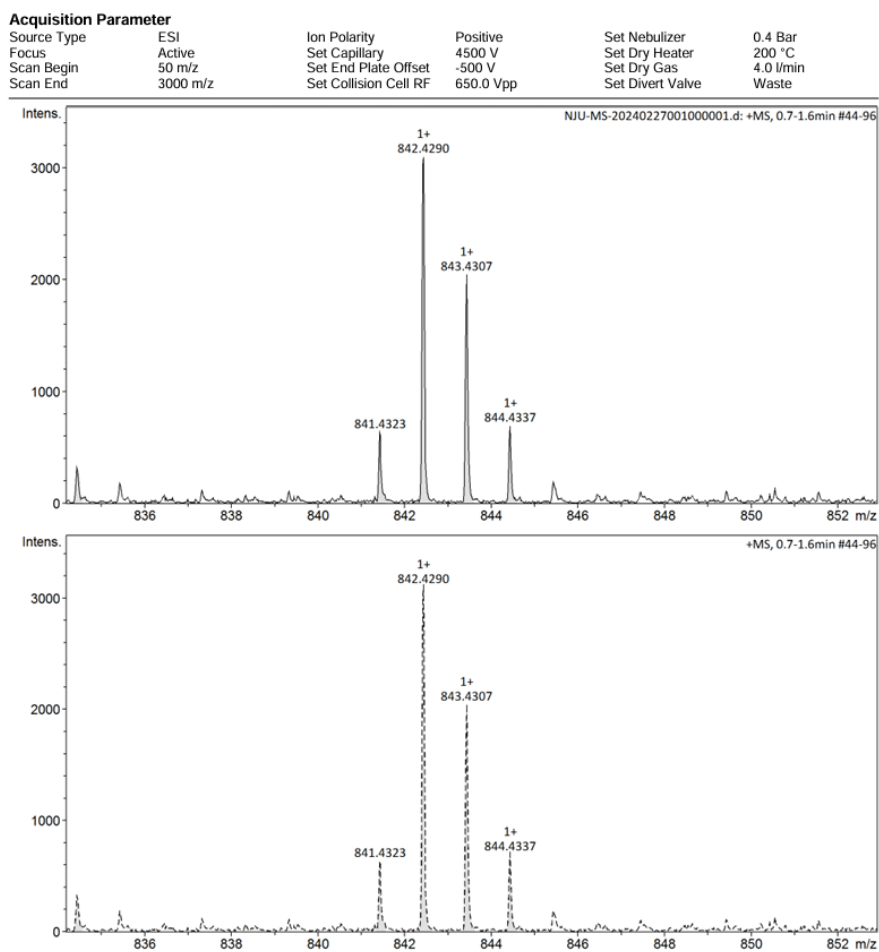

**Figure S3.** HRMS spectrum for NBOPO.

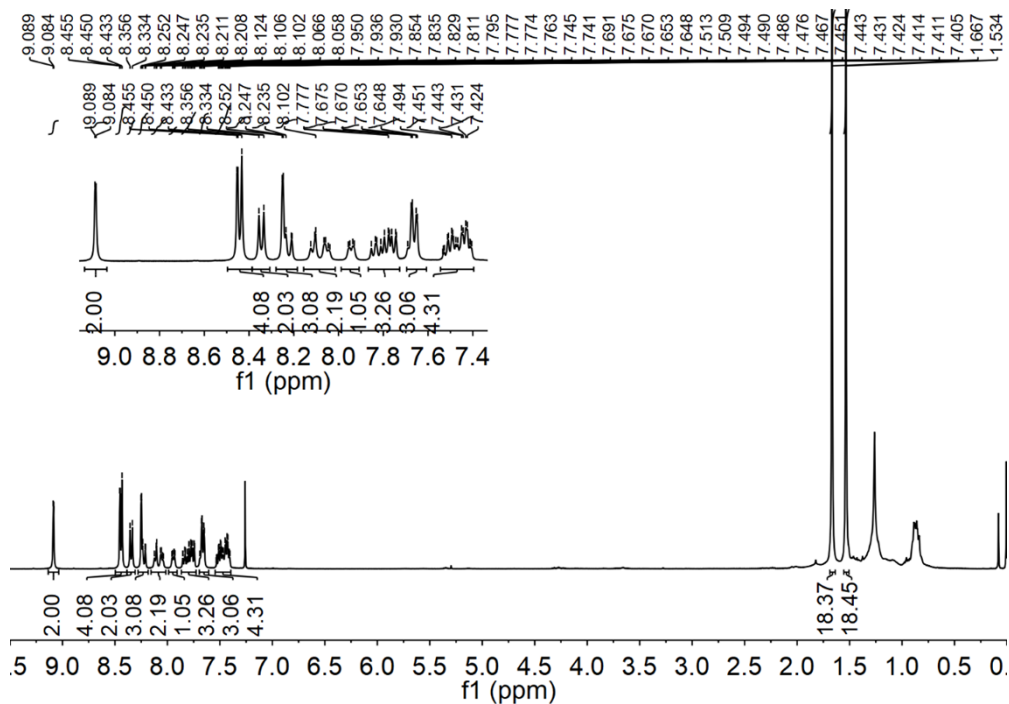

Figure S4.  $^1\text{H}$  NMR (400 MHz,  $\text{CDCl}_3$ ) spectrum of NBNPO.

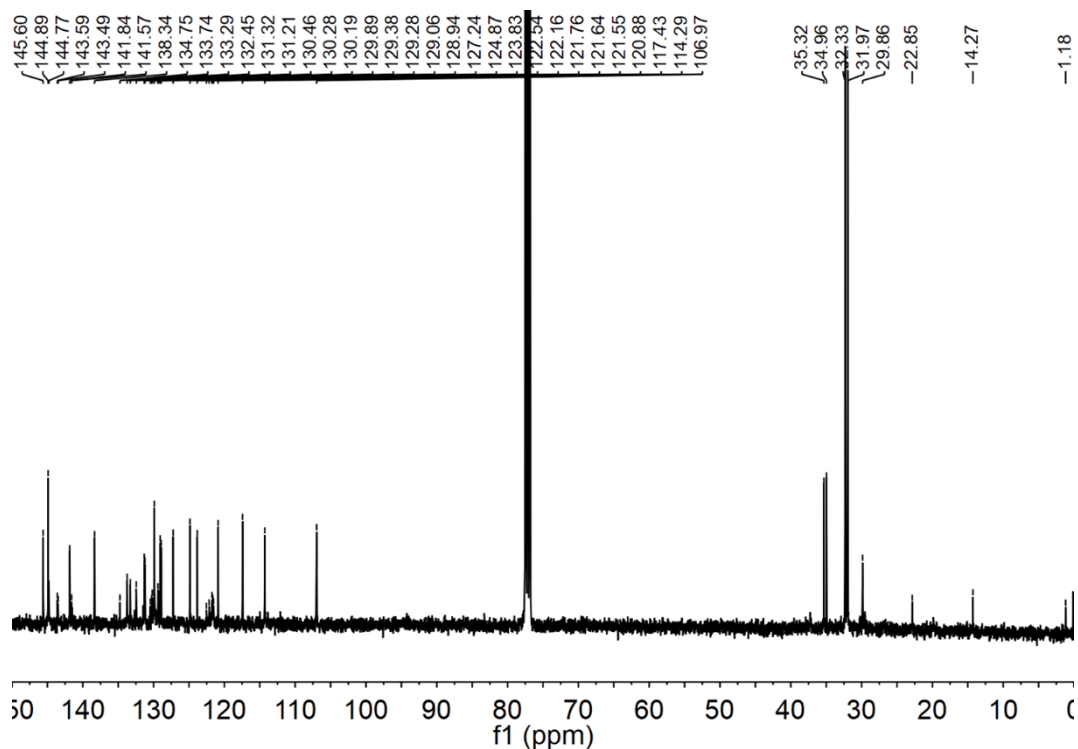

Figure S5.  $^{13}\text{C}$  NMR (101 MHz,  $\text{CDCl}_3$ ) spectrum of NBNPO.

**Acquisition Parameter**

|             |          |                       |           |                  |           |
|-------------|----------|-----------------------|-----------|------------------|-----------|
| Source Type | ESI      | Ion Polarity          | Positive  | Set Nebulizer    | 0.4 Bar   |
| Focus       | Active   | Set Capillary         | 4500 V    | Set Dry Heater   | 200 °C    |
| Scan Begin  | 50 m/z   | Set End Plate Offset  | -500 V    | Set Dry Gas      | 4.0 l/min |
| Scan End    | 3000 m/z | Set Collision Cell RF | 650.0 Vpp | Set Divert Valve | Waste     |

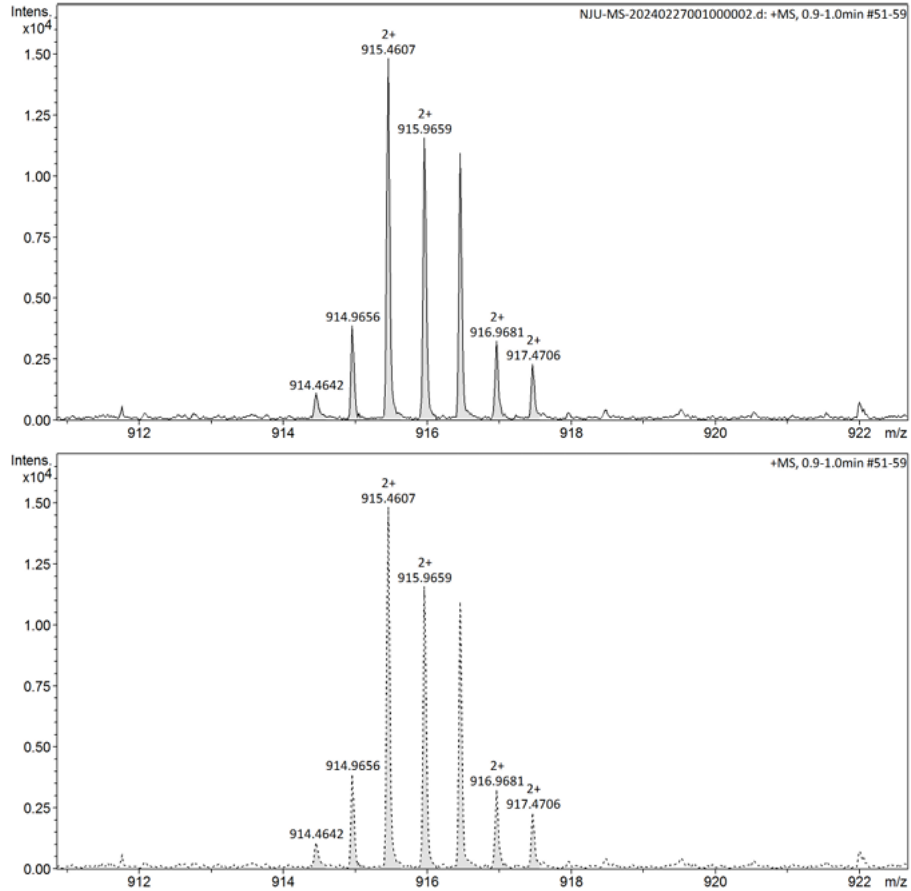

**Figure S6.** HRMS spectrum for NBNPO.

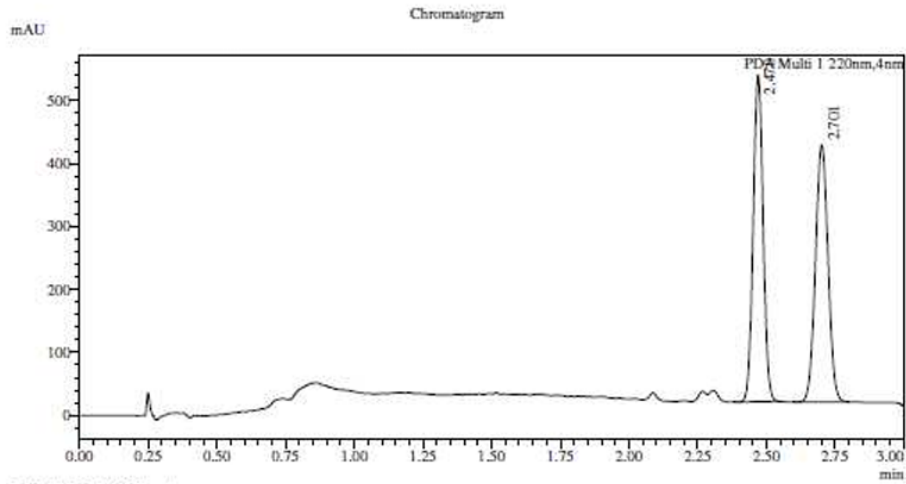

1 PDA Multi 1 / 220nm,4nm

**Integration Result**

**Peak Table**

| Peak# | Ret. Time | Height | Height% | Resolution(USP) | Area    | Area%  |
|-------|-----------|--------|---------|-----------------|---------|--------|
| 1     | 2.470     | 514438 | 55.885  | --              | 1301872 | 50.036 |
| 2     | 2.701     | 406092 | 44.115  | 2.955           | 1299993 | 49.964 |



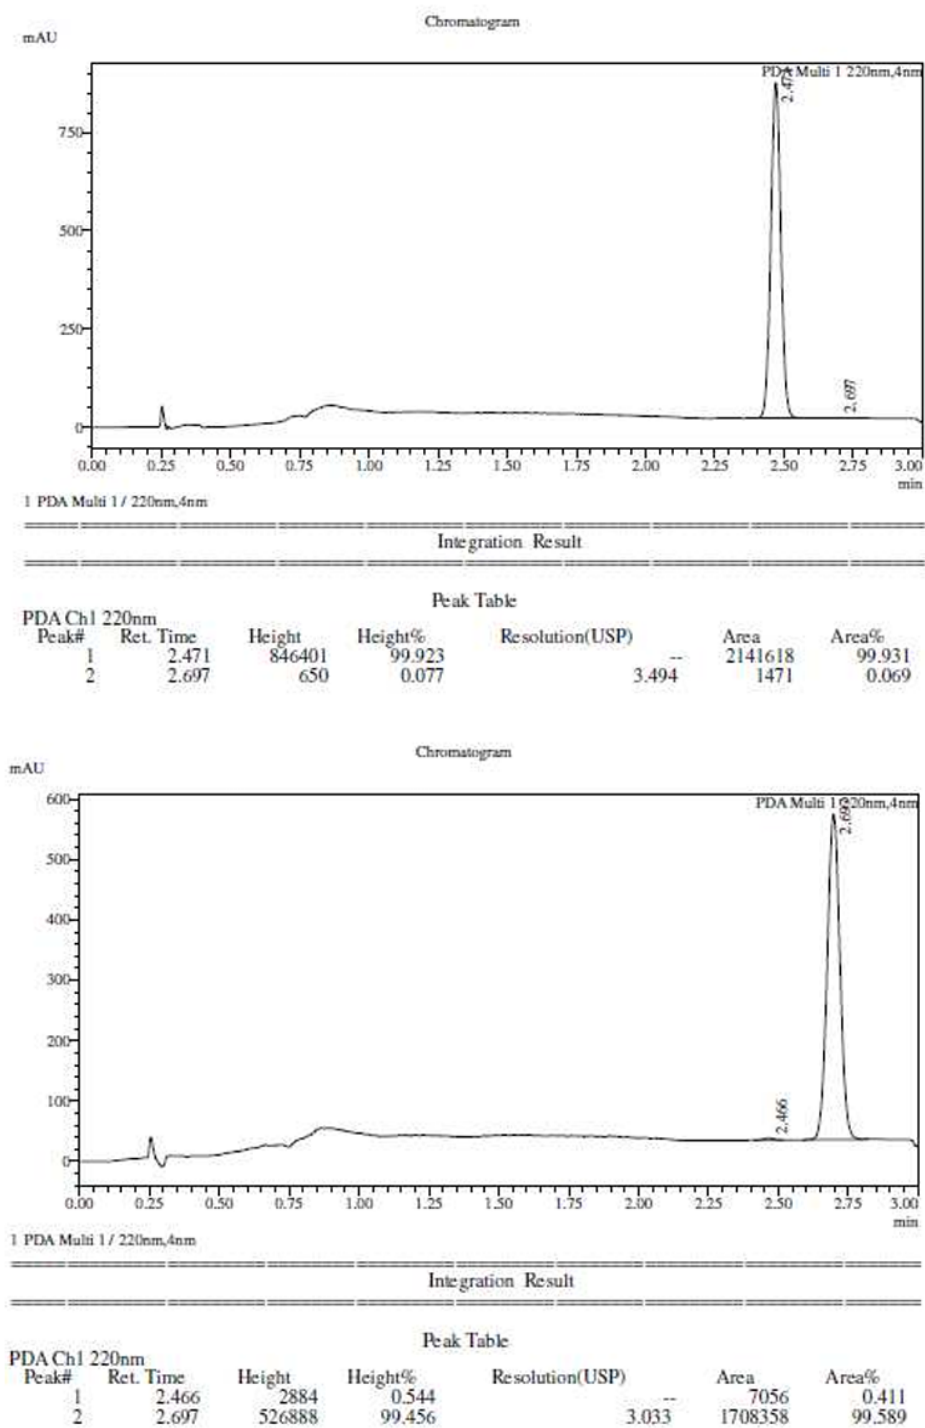

**Figure S7.** Chiral HPLC analysis of racemic **POBr** eluted by IPA (0.05% DEA) in CO<sub>2</sub> from 5% to 40% using Chiralpak AD-3 column (50\*4.6 mm, 3 μm). Elution rate: 3 mL/min.

**Table S1.** Crystal data and structure refinement for (*S*)-NBOPO and (*S*)-NBNPO.

| Parameter                                 | ( <i>S</i> )-NBOPO                                                   | ( <i>S</i> )-NBNPO                                                  |
|-------------------------------------------|----------------------------------------------------------------------|---------------------------------------------------------------------|
| CCDC No.                                  | 2344376                                                              | 2344374                                                             |
| Empirical formula                         | C <sub>58</sub> H <sub>57</sub> BNO <sub>2</sub> P                   | C <sub>64</sub> H <sub>60</sub> BN <sub>2</sub> OP                  |
| Formula weight                            | 841.42                                                               | 914.45                                                              |
| Temperature/K                             | 193.00                                                               | 193.00                                                              |
| Crystal system                            | monoclinic                                                           | trigonal                                                            |
| Space group                               | <i>P</i> 2 <sub>1</sub>                                              | <i>P</i> 3 <sub>2</sub> 21                                          |
| <i>a</i> /Å                               | 9.2454(13)                                                           | 32.7114(13)                                                         |
| <i>b</i> /Å                               | 19.524(3)                                                            | 32.7114(13)                                                         |
| <i>c</i> /Å                               | 29.571(6)                                                            | 23.7266(14)                                                         |
| <i>α</i> /°                               | 90                                                                   | 90                                                                  |
| <i>β</i> /°                               | 92.763(7)                                                            | 90                                                                  |
| <i>γ</i> /°                               | 90                                                                   | 120                                                                 |
| Volume/Å <sup>3</sup>                     | 5331.5(15)                                                           | 21987(2)                                                            |
| <i>Z</i>                                  | 2                                                                    | 12                                                                  |
| $\rho_{\text{calc}}/\text{cm}^3$          | 1.181                                                                | 0.829                                                               |
| $\mu/\text{mm}^{-1}$                      | 1.926                                                                | 0.566                                                               |
| <i>F</i> (000)                            | 2002.0                                                               | 5832.0                                                              |
| Crystal size/mm <sup>3</sup>              | 0.12 × 0.11 × 0.09                                                   | 0.12 × 0.11 ×<br>0.09                                               |
| Radiation                                 | CuK $\alpha$ ( $\lambda$ =<br>1.54178)                               | CuK $\alpha$ ( $\lambda$<br>=1.54178)                               |
| 2 $\Theta$ range for data<br>collection/° | 5.426 to 136.48                                                      | 3.118 to 137.428                                                    |
| Index ranges                              | -11 ≤ <i>h</i> ≤ 11, -23<br>≤ <i>k</i> ≤ 23, -235 ≤ <i>l</i><br>≤ 35 | -39 ≤ <i>h</i> ≤ 21, -31<br>≤ <i>k</i> ≤ 39, -22 ≤ <i>l</i><br>≤ 28 |

|                                             |                                        |                                        |
|---------------------------------------------|----------------------------------------|----------------------------------------|
| Reflections collected                       | 80238                                  | 147643                                 |
| Independent reflections                     | 18201 [Rint = 0.1205, Rsigma = 0.0988] | 25876 [Rint = 0.0948, Rsigma = 0.0675] |
| Data/restraints/parameters                  | 18201/275/1295                         | 25876/1572/1312                        |
| Goodness-of-fit on F <sup>2</sup>           | 1.030                                  | 1.005                                  |
| Final R indexes [I>2σ (I)]                  | R1 = 0.0927, wR2 = 0.2468              | R1 = 0.0834, wR2 = 0.2298              |
| Final R indexes [all data]                  | R1 = 0.1386, wR2 = 0.2880              | R1 = 0.1228, wR2 = 0.2811              |
| Largest diff. peak/hole / e Å <sup>-3</sup> | 0.65/-0.34                             | 0.27/-0.27                             |
| Flack parameter                             | 0.052(13)                              | 0.091(13)                              |

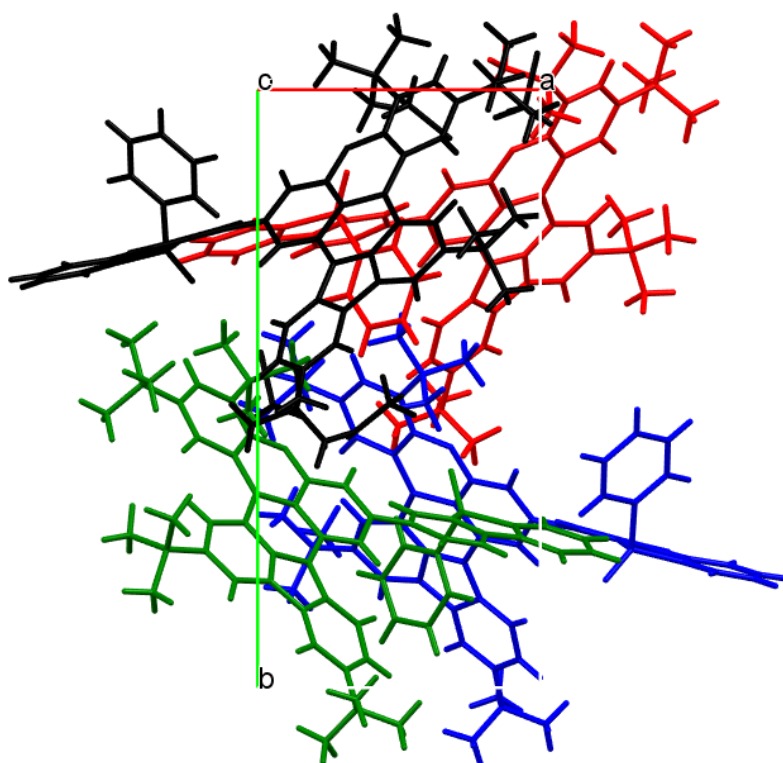

**Figure S8.** Packing mode of (*S*)-NBOPO alongside *c* axis.

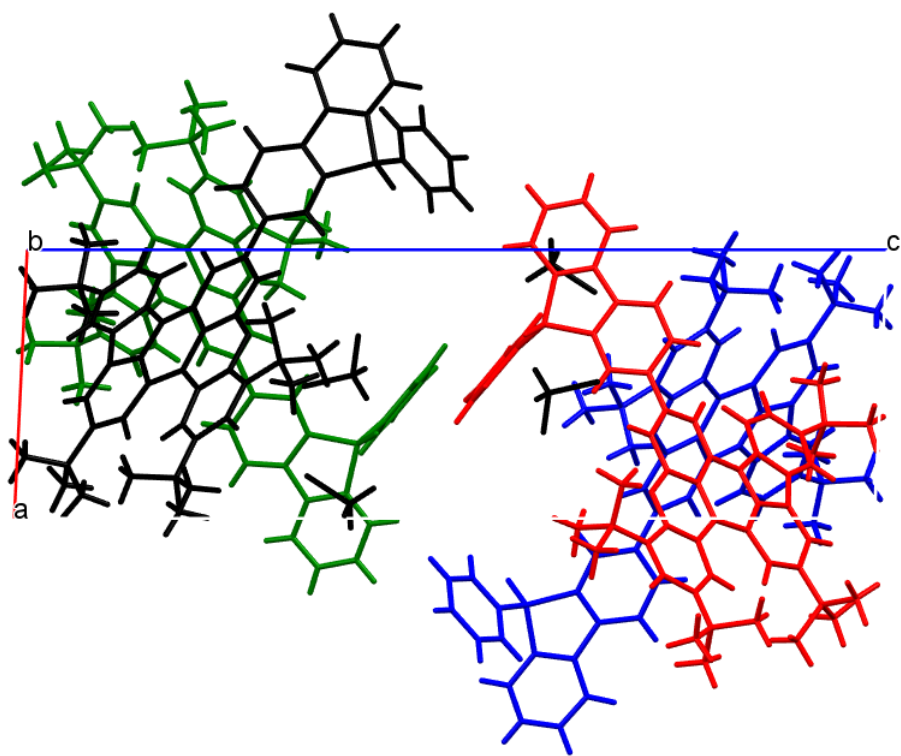

**Figure S9.** Packing mode of (*S*)-NBOPO alongside b axis.

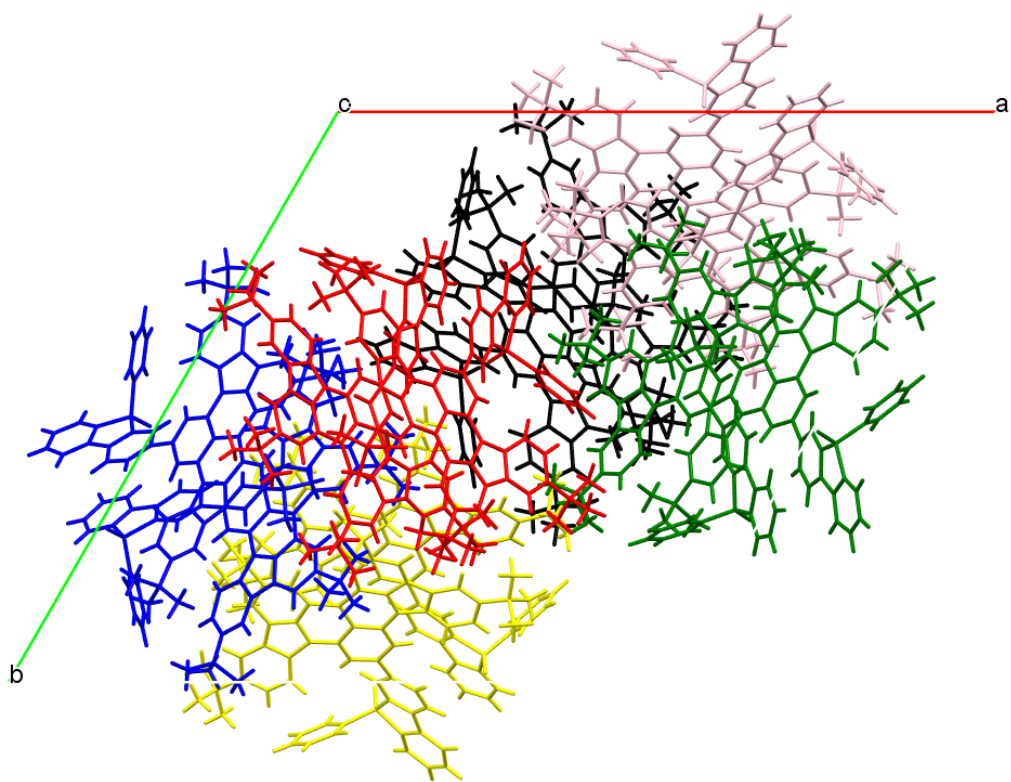

**Figure S10.** Packing mode of (*S*)-NBNPO alongside c axis.

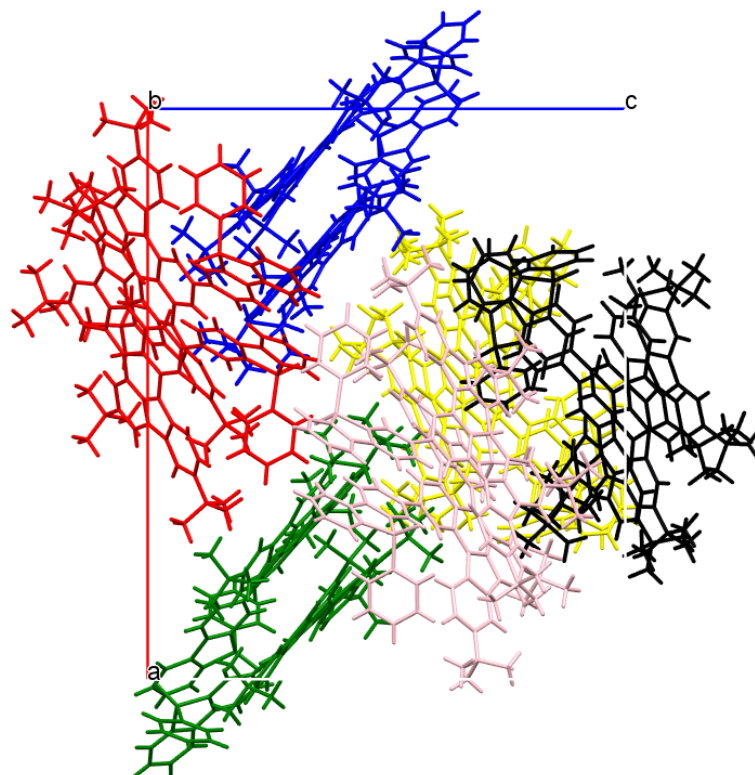

**Figure S11.** Packing mode of (*S*)-NBNPO alongside b axis.

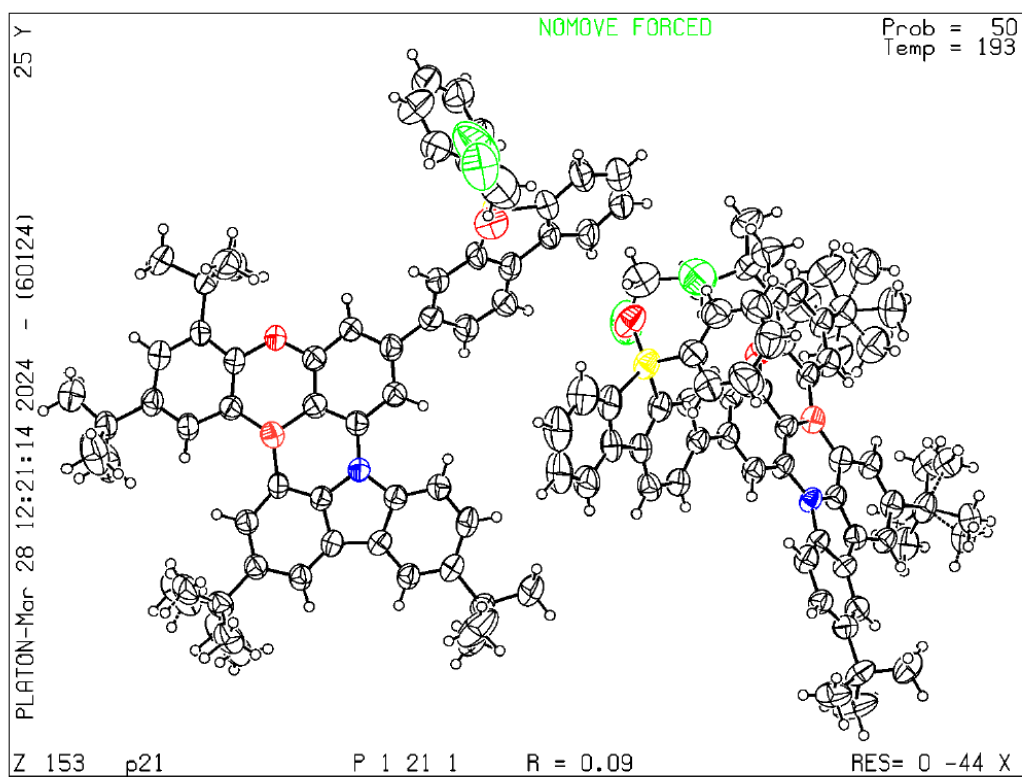

**Figure S12.** Crystal structure of (*S*)-NBOPO.

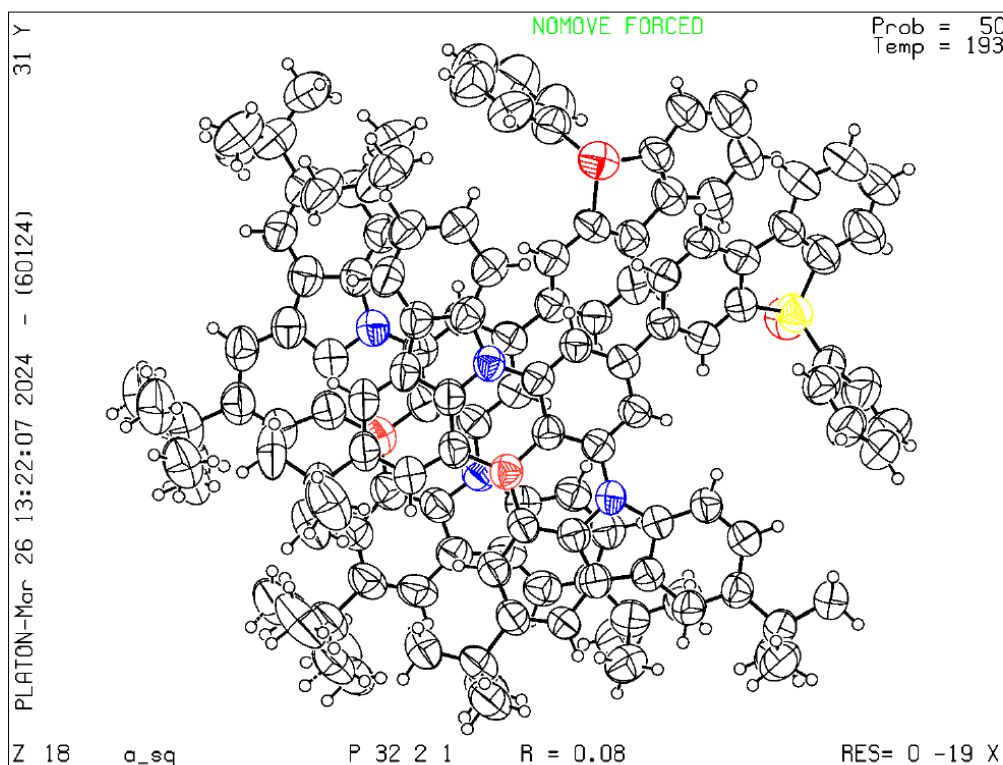

**Figure S13.** Crystal structure of (*S*)-NBNPO.

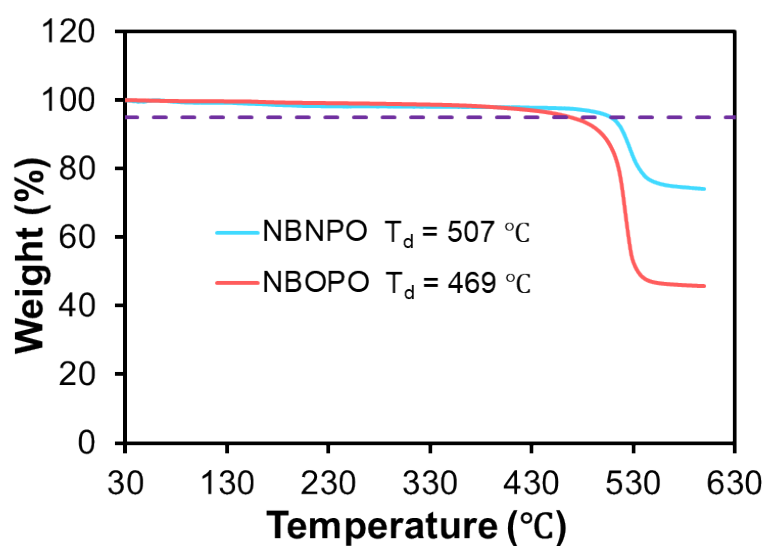

**Figure S14.** The TGA curves of NBOPO and NBNPO.

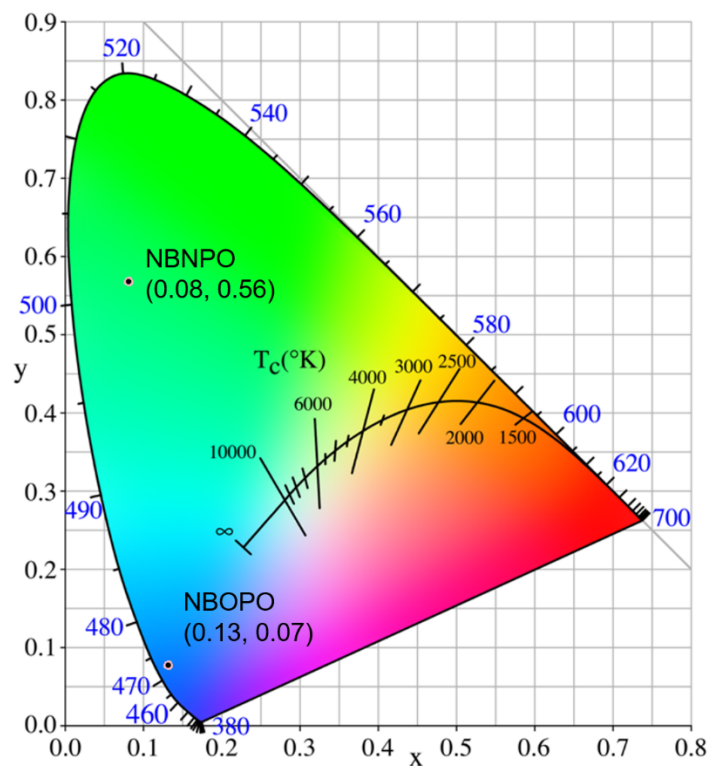

**Figure S15.** The corresponding CIE coordinates of NBOPO and NBNPO in toluene ( $3 \times 10^{-5}$  M).

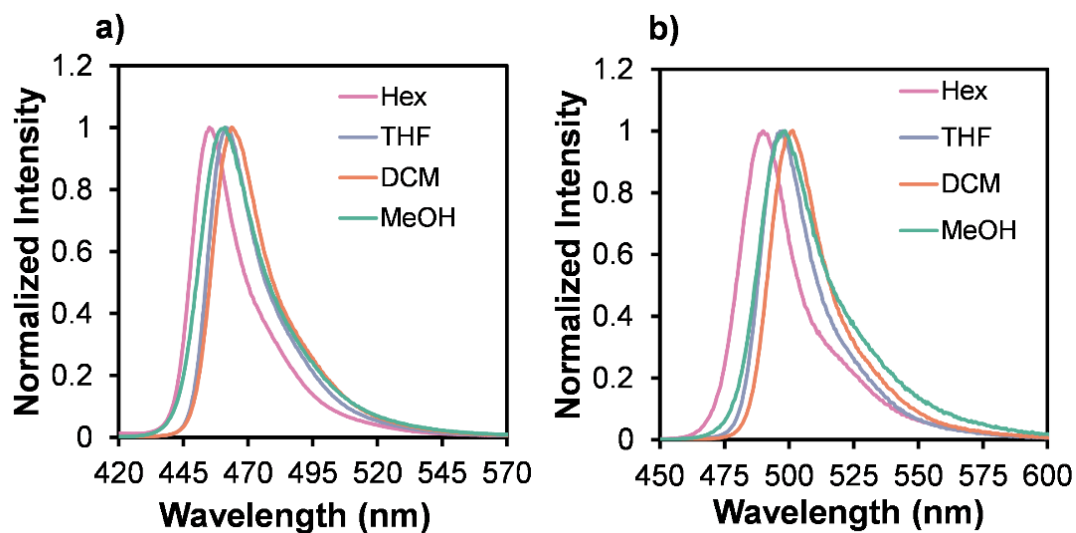

**Figure S16.** PL spectra of a) NBOPO, and b) NBNPO at room temperature in different solvents ( $3 \times 10^{-5}$  M).

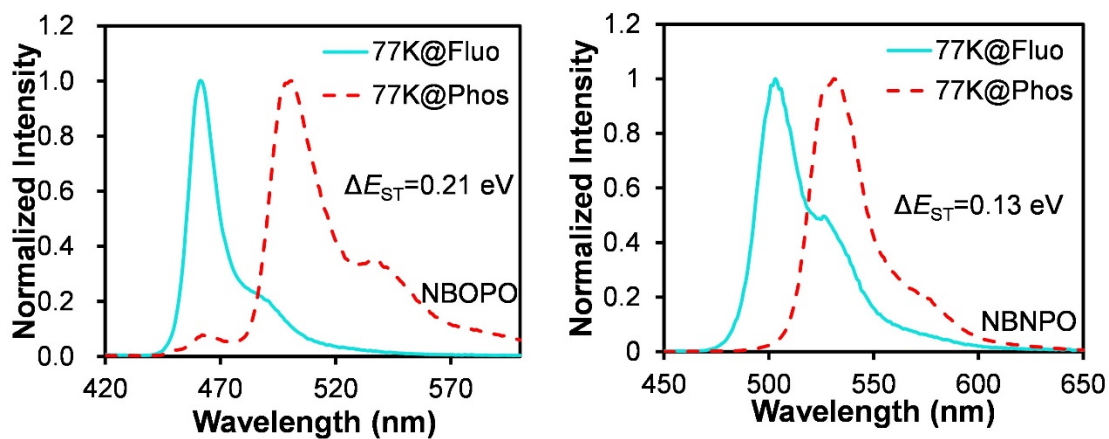

**Figure S17.** The fluorescence and phosphorescence spectra of NBOPO (left) and NBNPO (right) in toluene at 77 K.

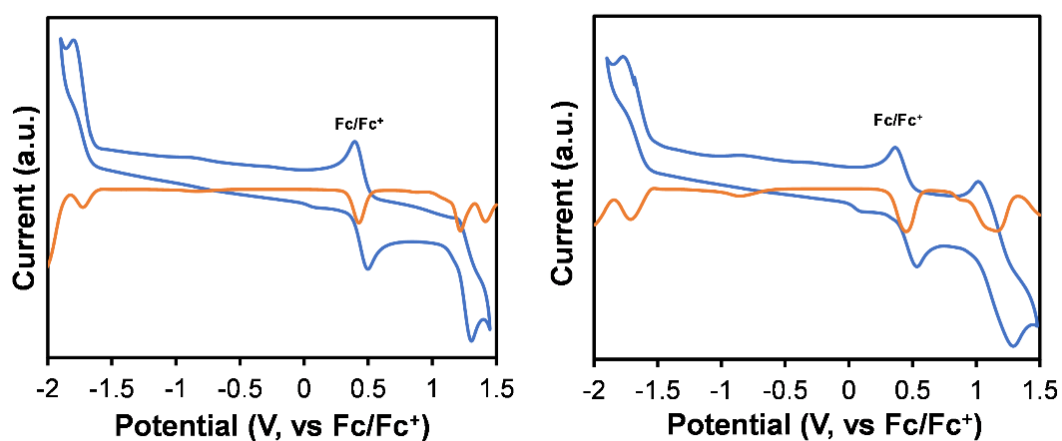

**Figure S18.** Cyclic voltammograms and differential pulse voltammetry curves for NBOPO (left) and NBNPO (right). The curves were measured at room temperature with 0.1 M solution of  $n\text{-Bu}_4\text{NPF}_6$  in  $\text{CH}_2\text{Cl}_2$  for the reduction and the oxidation scan (vs  $\text{Fc}/\text{Fc}^+$ ); HOMO and LUMO energies obtained from electrochemical data.



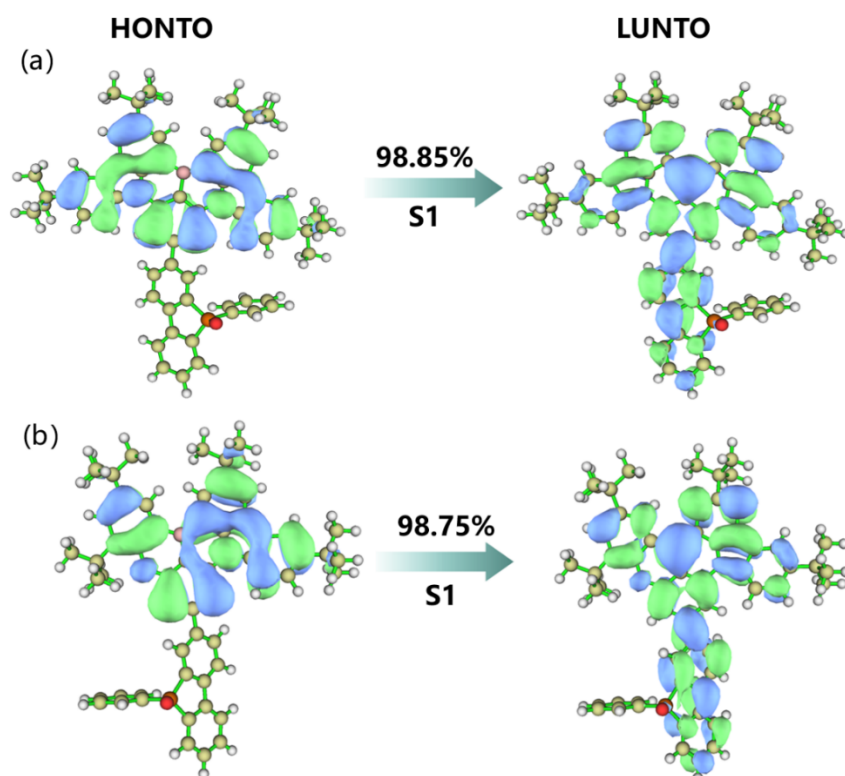

**Figure S19.** Natural transition orbitals (NTOs) describing the excitation characters of the S1 state in (a) NBNPO (b) NBOPO: the weights of the NTO pair with the highest contributions to the excitations are included. For these two compounds, the transition of the S1 state is predominantly dominated by  $\pi$  to  $\pi^*$  transitions.

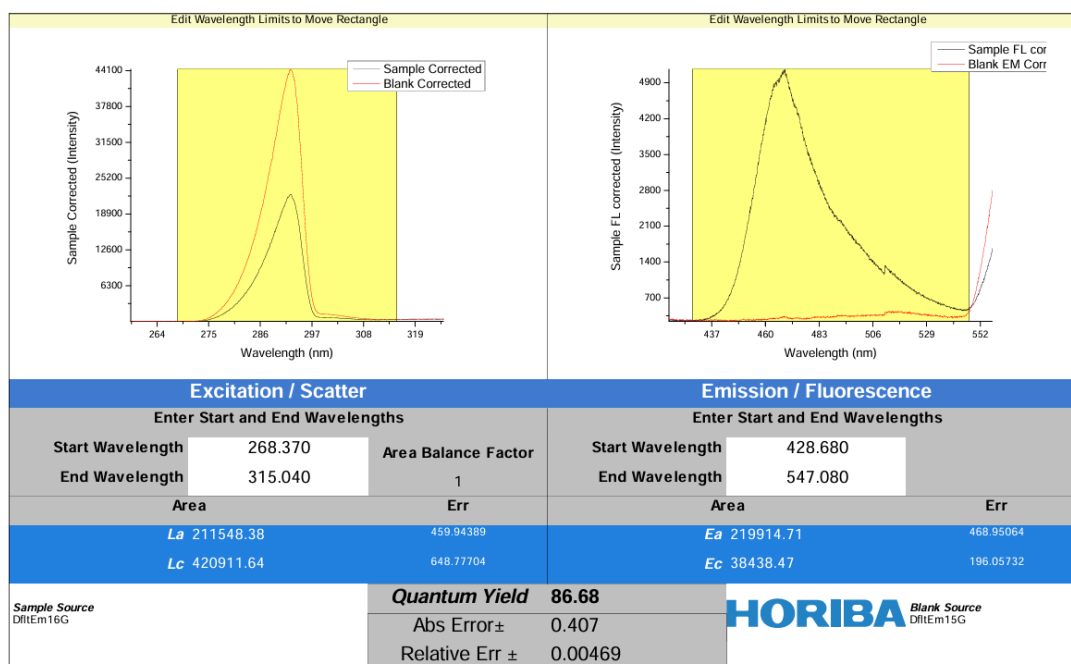

**Figure S20.** PLQY of NBOPO in doped film (5 wt%).

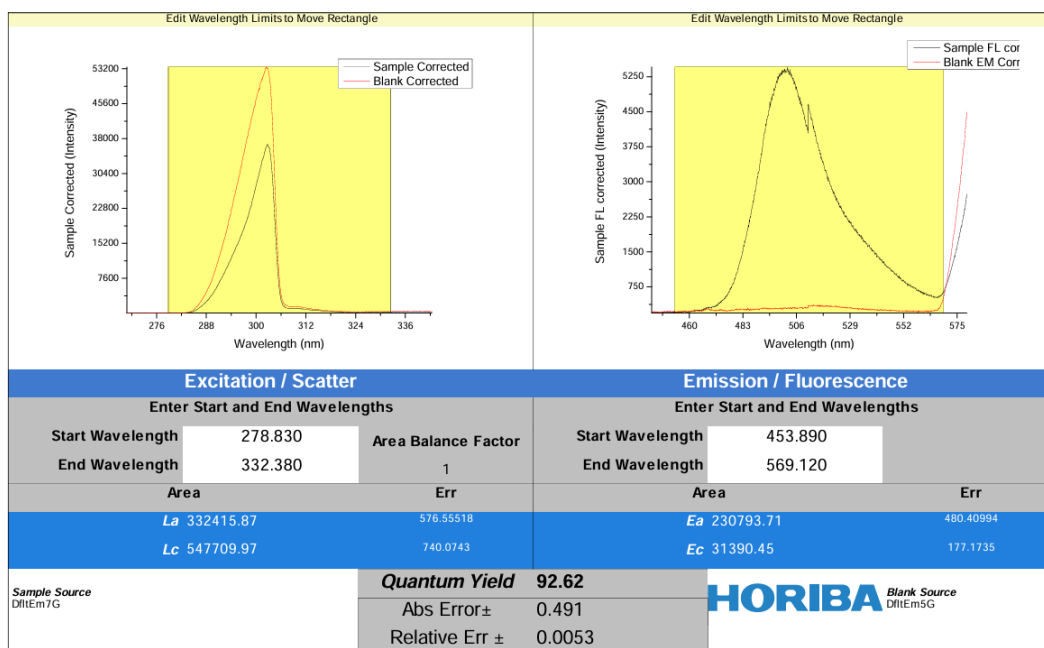

Figure S21. PLQY of NBNPO in doped film (5 wt%).

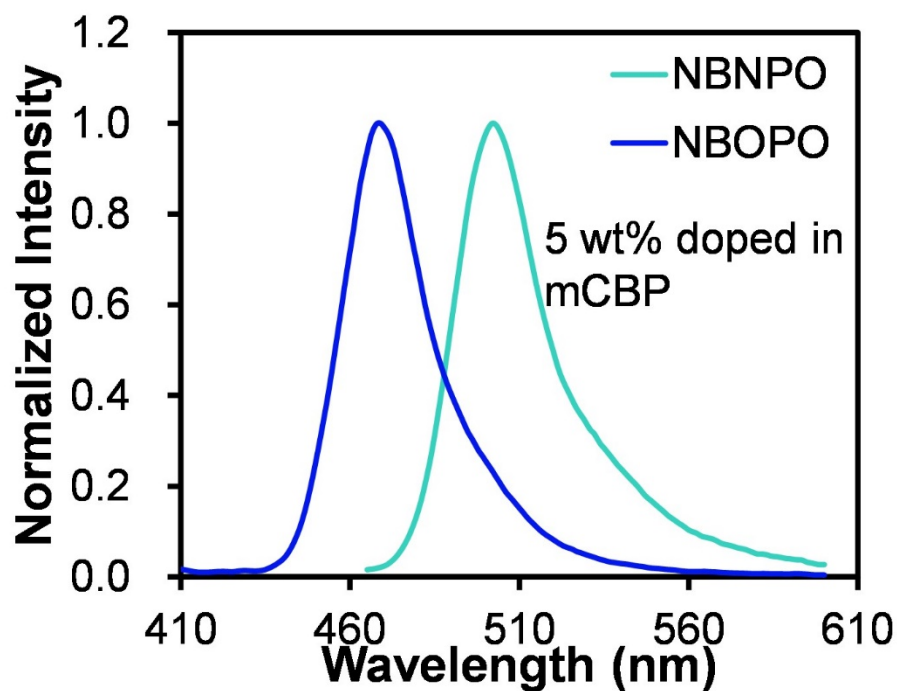

Figure S22. The measured PL spectra of 5 wt% NBOPO and NBNPO doped in mCBP host at room temperature.

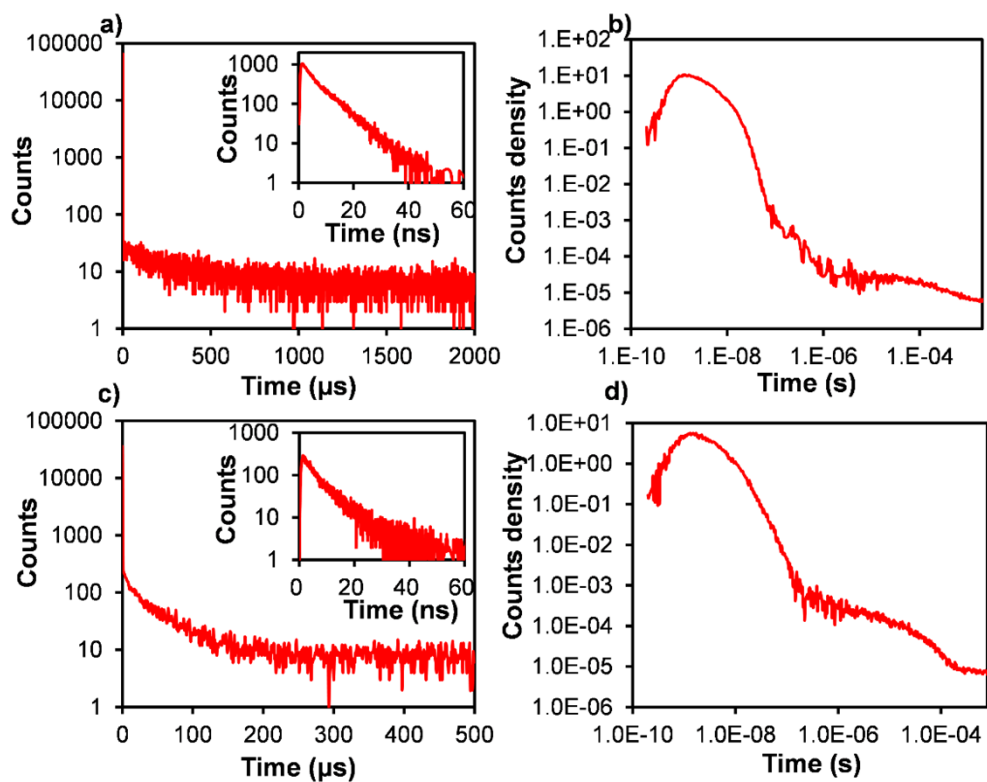

**Figure S23.** The transient PL prompt and decay curves of a), b) NBOPO and c), d) NBNPO doped in the host at room temperature (5 wt%).

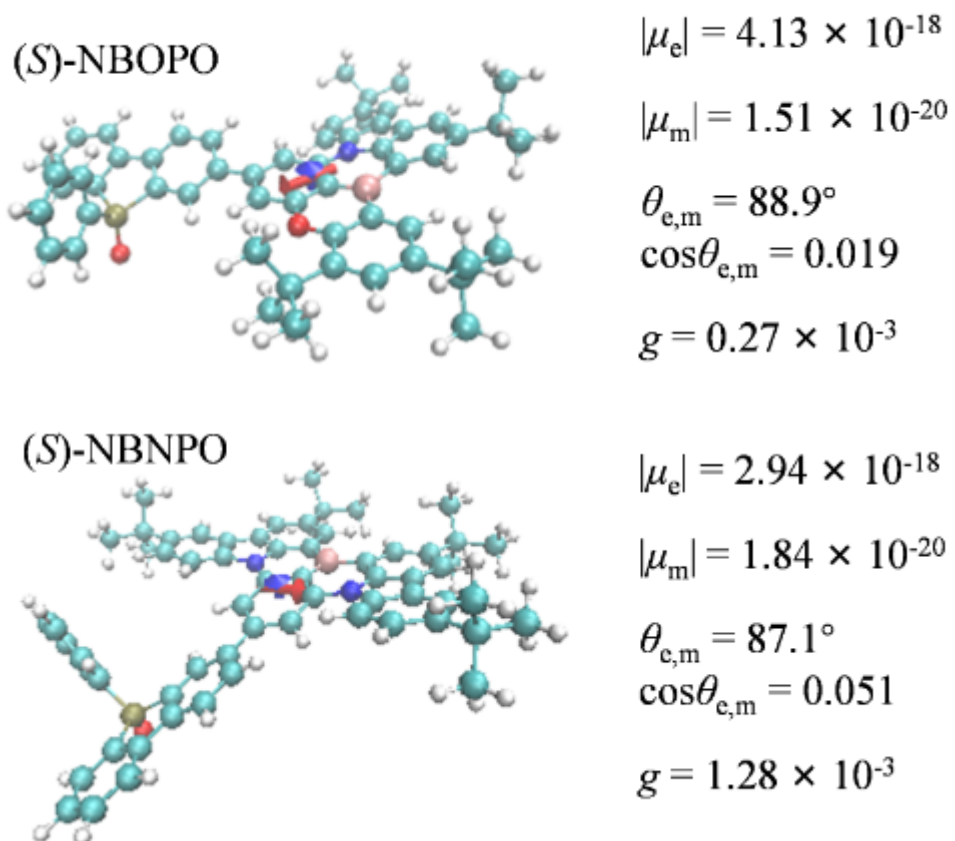

**Figure S24.** Simulated electronic transition dipoles ( $\mu_e$ , red), magnetic transition dipoles ( $\mu_m$ , blue),  $\cos\theta_{e,m}$  and calculated  $g$  values.

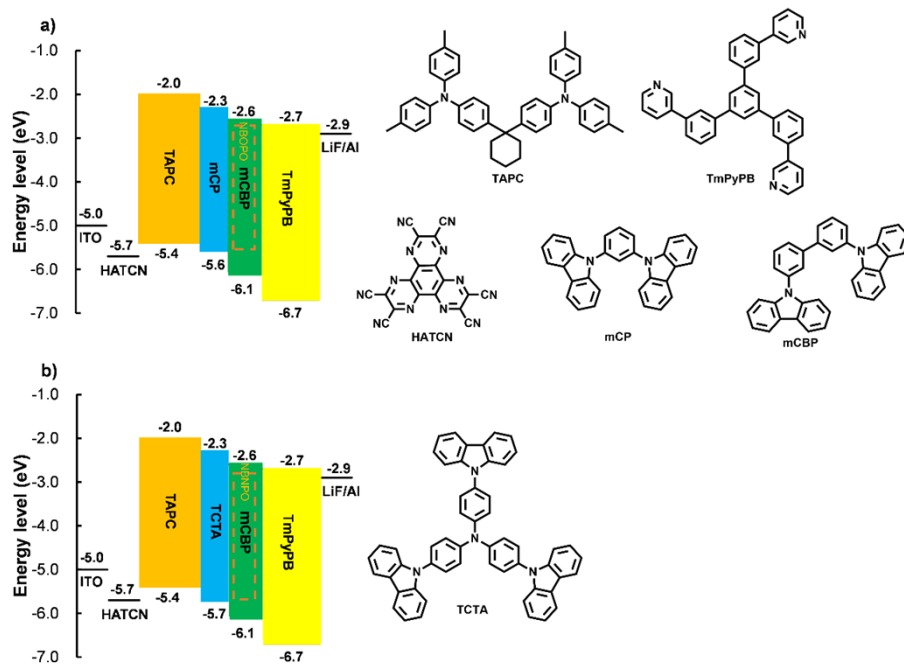

**Figure S25.** Structure and energy diagrams of CP-OLEDs of a) (*R/S*)-NBOPO and b) (*R/S*)-NBNPO.

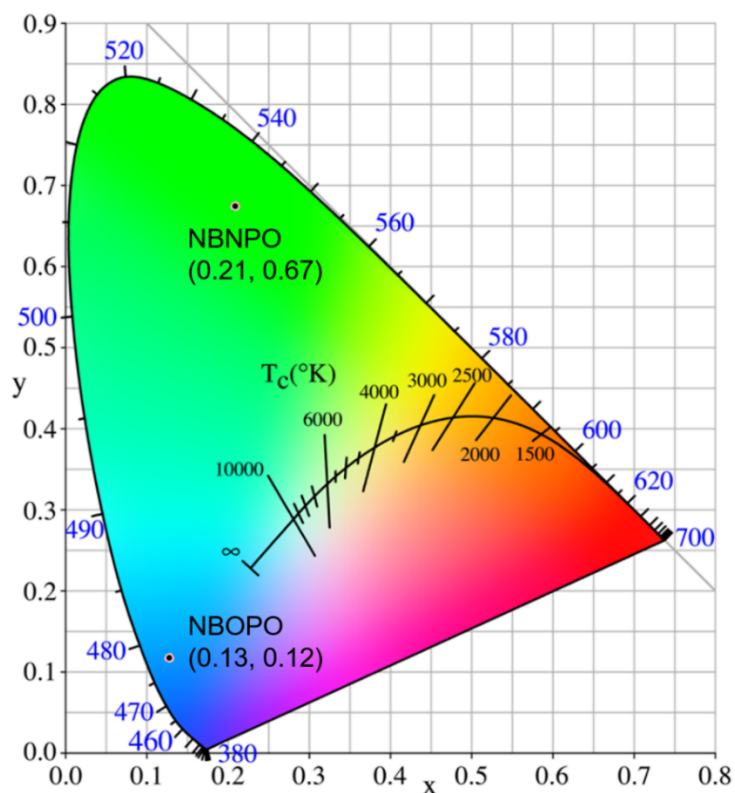

**Figure S26.** The corresponding CIE coordinates of (*R*)-NBOPO and (*R*)-NBNPO in OLEDs.

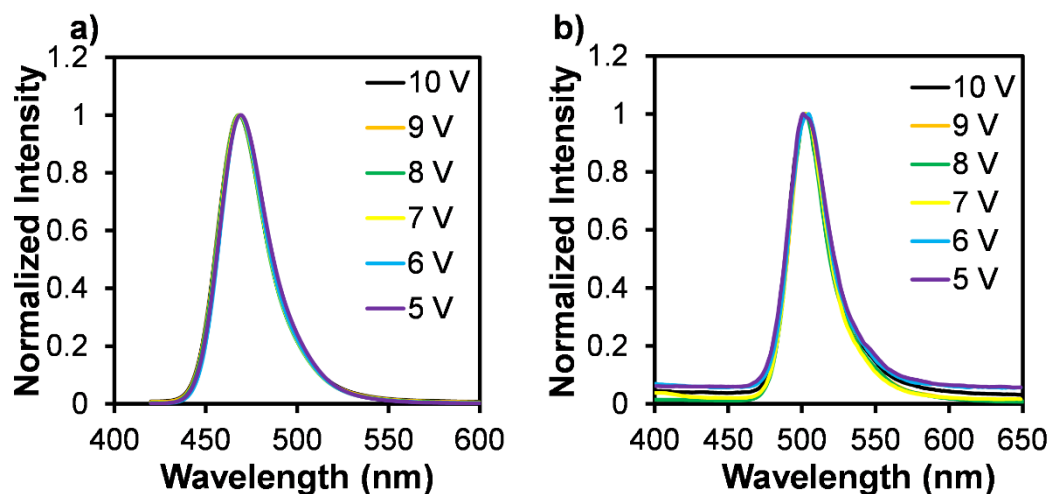

**Figure S27.** EL spectra of a) (R)-NBOPO and b) (R)-NBNPO device at different voltages

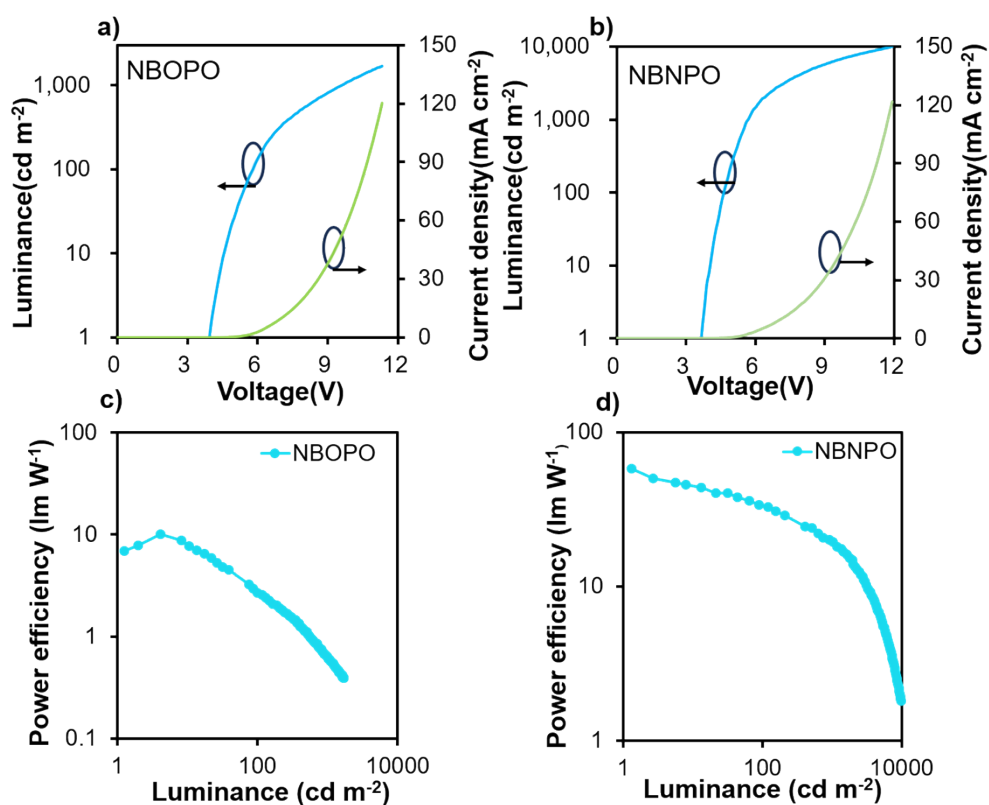

**Figure S28.** Luminance and current density versus voltage curves of a) (R)-NBOPO and b) (R)-NBNPO; Power efficiency versus luminance curves of c) (R)-NBOPO and d) (R)-NBNPO

**Table S2.** TD-DFT calculated electronic transitions for NBOPO along with their corresponding excitation energies and oscillator strengths.

| Compound | Spin State     | Transition Configuration | Excitation Energy [nm (eV)] | Oscillator Strength |
|----------|----------------|--------------------------|-----------------------------|---------------------|
| NBOPO    | S <sub>1</sub> | HOMO→LUMO (94%)          | 413.44 (3.00)               | 0.3725              |
|          |                | HOMO→LUMO+1 (5%)         |                             |                     |
|          | S <sub>2</sub> | HOMO→LUMO (5%)           | 353.50 (3.51)               | 0.0503              |
|          |                | HOMO→LUMO+1 (91%)        |                             |                     |
|          | S <sub>3</sub> | HOMO-3→LUMO (2%)         | 343.52 (3.61)               | 0.0326              |
|          |                | HOMO-2→LUMO (6%)         |                             |                     |
|          |                | HOMO-1→LUMO (83%)        |                             |                     |
|          |                | HOMO-1→LUMO+1 (5%)       |                             |                     |
|          | S <sub>4</sub> | HOMO-3→LUMO (23%)        | 333.88 (3.71)               | 0.9217              |
|          |                | HOMO-3→LUMO+1 (4%)       |                             |                     |
|          |                | HOMO-2→LUMO (61%)        |                             |                     |
|          |                | HOMO-1→LUMO (8%)         |                             |                     |
|          | S <sub>5</sub> | HOMO-3→LUMO (64%)        | 330.04 (3.76)               | 0.1141              |
|          |                | HOMO-2→LUMO (24%)        |                             |                     |
|          |                | HOMO-2→LUMO+1 (8%)       |                             |                     |

**Table S3.** TD-DFT calculated electronic transitions for NBNPO along with their corresponding excitation energies and oscillator strengths.

| Compound | Spin State     | Transition Configuration | Excitation Energy [nm (eV)] | Oscillator Strength |
|----------|----------------|--------------------------|-----------------------------|---------------------|
| NBNPO    | S <sub>1</sub> | HOMO→LUMO (96%)          | 447.90 (2.77)               | 0.4781              |
|          |                | HOMO→LUMO+1 (2%)         |                             |                     |

|  |                |                    |               |        |
|--|----------------|--------------------|---------------|--------|
|  | S <sub>2</sub> | HOMO→LUMO (2%)     | 370.28 (3.35) | 0.0475 |
|  |                | HOMO→LUMO+1 (94%)  |               |        |
|  | S <sub>3</sub> | HOMO-1→LUMO (91%)  | 360.97 (3.43) | 0.0283 |
|  |                | HOMO-1→LUMO+1 (3%) |               |        |
|  | S <sub>4</sub> | HOMO-3→LUMO (2%)   | 356.23 (3.48) | 0.0106 |
|  |                | HOMO-2→LUMO (91%)  |               |        |
|  |                | HOMO-2→LUMO+1 (3%) |               |        |
|  | S <sub>5</sub> | HOMO-4→LUMO (3%)   | 348.74 (3.56) | 0.0476 |
|  |                | HOMO-3→LUMO (88%)  |               |        |
|  |                | HOMO-2→LUMO (3%)   |               |        |

**Table S4.** The photophysical and chiroptical performances of reported CP-MR-TADF materials.

| Molecular structure                                                                 | $\lambda_{\max}$<br>(nm) | Chiral<br>type | $ g_{EL} $<br>( $\times 10^{-3}$ ) | $ g_{PL} $<br>(doped film)<br>( $\times 10^{-3}$ ) | Ref.                                                 |
|-------------------------------------------------------------------------------------|--------------------------|----------------|------------------------------------|----------------------------------------------------|------------------------------------------------------|
| 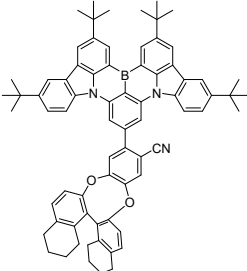 | 493                      | Axial          | 1.43                               | 0.91                                               | <i>Adv. Mater.</i> ,<br>2021, <b>33</b> ,<br>2100652 |
|  | 500                      | Axial          | 0.47                               | 1.04                                               |                                                      |
|  | 500                      | Helical        | 1.6                                | 1.1                                                | <i>Adv. Mater.</i> ,<br>2022, <b>34</b> ,<br>2105080 |
|  | 497                      | Helical        | 3.1                                | 1.3                                                | <i>Adv. Mater.</i> ,<br>2022, <b>34</b> ,            |



---

21050802

---

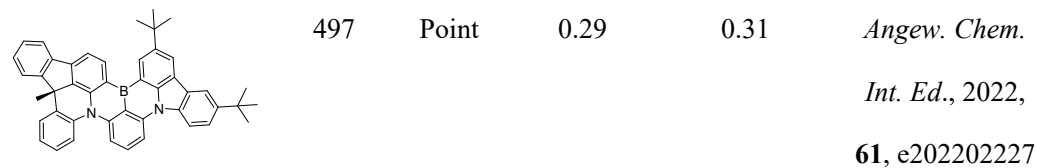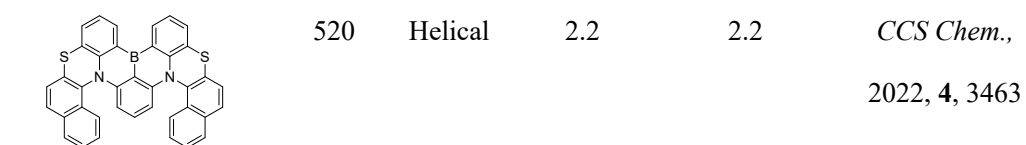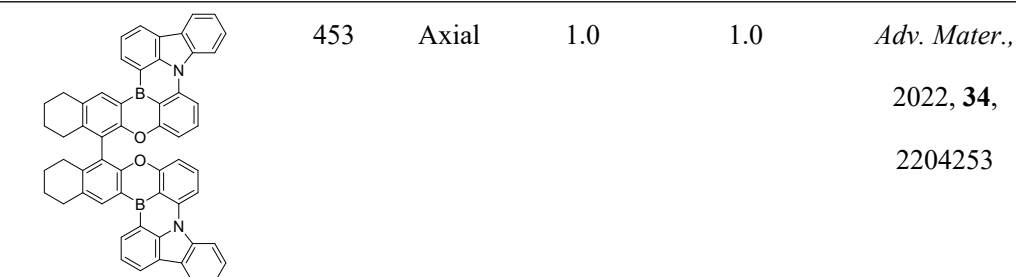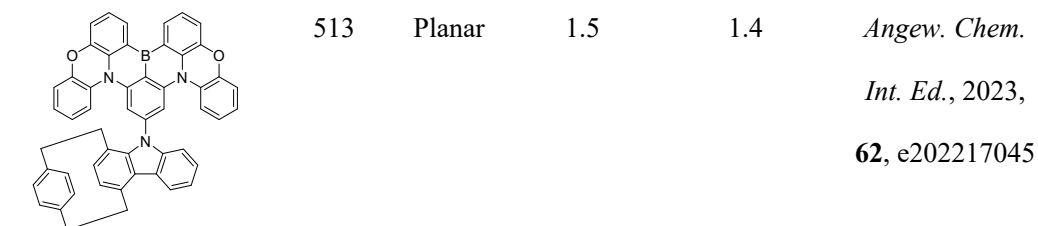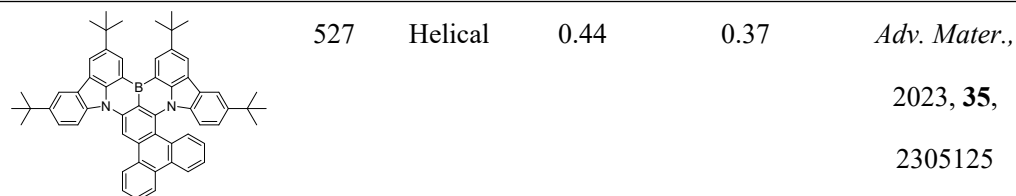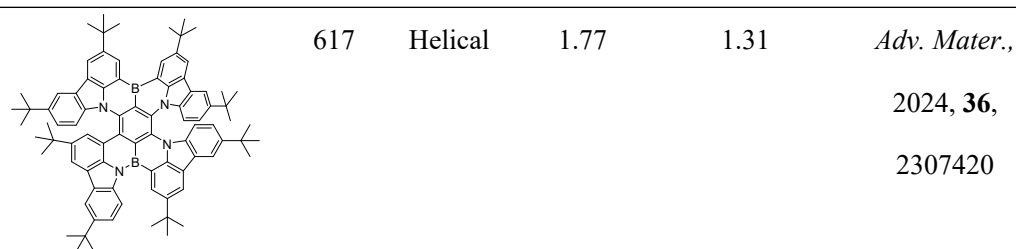

|                                                                                     |     |         |      |      |                                                                          |
|-------------------------------------------------------------------------------------|-----|---------|------|------|--------------------------------------------------------------------------|
| 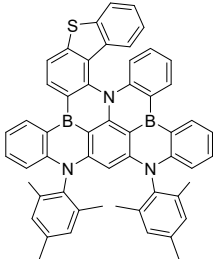   | 444 | Helical | 0.26 | 1.1  | <i>Adv. Mater.</i> ,<br>2024, <b>36</b> ,<br>2308314                     |
|    | 578 | Helical | 6.2  | -    | <i>Angew. Chem.</i><br><i>Int. Ed.</i> , 2024,<br><b>63</b> , e202401835 |
|   | 462 | Point   | 1.4  | 1.18 |                                                                          |
|  | 498 | Point   | 0.70 | 4.3  | This work                                                                |

## Reference

1. M. J. Frisch, G. W. Trucks, H. B. Schlegel, G. E. Scuseria, M. A. Robb, J. R. Cheeseman, G. Scalmani, V. Barone, B. Mennucci, G. A. Petersson, H. Nakatsuji, M. Caricato, X. Li, H. P. Hratchian, A. F. Izmaylov, J. Bloino, G. Zheng, J. L. Sonnenberg, M. Hada, M. Ehara, K. Toyota, R. Fukuda, J. Hasegawa, M. Ishida, T. Nakajima, Y. Honda, O. Kitao, H. Nakai, T. Vreven, J. A. Montgomery, J. E. Peralta, F. Ogliaro, M. J. Bearpark, J. Heyd, E. N. Brothers, K. N. Kudin, V. N. Staroverov, R. Kobayashi, J. Normand, K. Raghavachari, A. P. Rendell, J. C. Burant, S. S. Iyengar, J. Tomasi, M. Cossi, N. Rega, N. J. Millam, M. Klene, J. E. Knox, J. B. Cross, V. Bakken, C. Adamo, J. Jaramillo, R. Gomperts, R. E. Stratmann, O. Yazyev, A. J. Austin, R. Cammi, C. Pomelli, J. W. Ochterski, R. L. Martin, K. Morokuma, V. G. Zakrzewski, G. A. Voth, P. Salvador, J. J. Dannenberg, S. Dapprich, A. D. Daniels, Ö. Farkas, J. B. Foresman, J. V. Ortiz, J. Cioslowski, D. J. Fox, *Gaussian 09 Revision C.01*, 2010.
2. T. Lu and F. Chen, *J. Comput. Chem.*, 2012, **33**, 580-592.

3. Y. Xu, C. Li, Z. Li, J. Wang, J. Xue, Q. Wang, X. Cai and Y. Wang, *CCS Chemistry*, 2022, **4**, 2065-2079.
4. S. Cai, G. S. M. Tong, L. Du, G. K. M. So, F. F. Hung, T. L. Lam, G. Cheng, H. Xiao, X. Chang, Z. X. Xu and C. M. Che, *Angew. Chem. Int. Ed.*, 2022, **61**, e202213392.
5. K. Baba, M. Tobisu and N. Chatani, *Angew. Chem. Int. Ed.*, 2013, **52**, 11892-11895.
